# Supplementary material for: Electronic structure and thermoelectric properties of the Zintl compounds Sr5Al2Sb6 and Ca5Al2Sb6: first-principles study
Source: Royal Society of Chemistry journal article supplement (doi:10.1039/c5ra02033f), 2015-01-01
Supplement: c5ra02033f2.pdf [file c5ra02033f2.pdf]

Supplementary Materials

**Electronic structure and thermoelectric properties of Zintl  
compound  $\text{Sr}_5\text{Al}_2\text{Sb}_6$  and  $\text{Ca}_5\text{Al}_2\text{Sb}_6$ : First-principles study**

Lingyun Ye, Yuan Xu Wang<sup>a</sup>, Jueming Yang, Yuli  
Yan, Jihua Zhang, Libin Guo, and Zhenzhen Feng

*Institute for Computational Materials Science,  
School of Physics and Electronics, Henan University,  
Kaifeng 475004, People's Republic of China*

---

<sup>a</sup> Email: wangyx@henu.edu.cn

We simulate the  $ZT$  value of  $\text{Ca}_5\text{Al}_2\text{Sb}_6$  as a function of carrier concentration at 700 K without considering the anisotropy, shown as Fig. S1(b). Comparing with the experimental work from Ref. 7, shown as Fig. S1(a), we can see that the simulated  $ZT$  value agree with the experimental work, indicating that our computational method is believable.

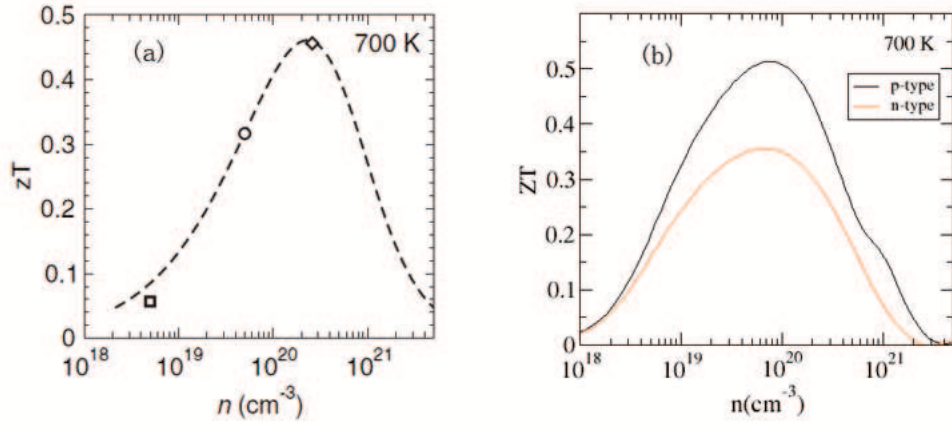

FIG. 1. (a) Experimental  $ZT$  value of  $\text{Ca}_5\text{Al}_2\text{Sb}_6$  versus carrier concentration at 700 K, (b) Simulate  $ZT$  value of  $\text{Ca}_5\text{Al}_2\text{Sb}_6$  versus carrier concentration at 700 K.
